# Supplementary material for: LncRNA KCNQ1OT1 Secreted by Tumor Cell-Derived Exosomes Mediates Immune Escape in Colorectal Cancer by Regulating PD-L1 Ubiquitination via MiR-30a-5p/USP22
Source: Front Cell Dev Biol. 2021 Jul 19;9:653808. doi: 10.3389/fcell.2021.653808 (PMC8326752; doi:10.3389/fcell.2021.653808)
Supplement: Supplementary file 6 [file Data_Sheet_5.XLSX]

## Sheet: Fig 5B
	sample	Ct			Δct			2-ΔΔct			2-Δδctmean	2-ΔΔctSD	relative mean	relative SD
	NC1-KCNQ1OT1	19.06	19.16	18.24	3.41	3.54	3.06	0.8	0.73	1.02	0.896	0.118	1.027	0.135
	NC2-KCNQ1OT1	18.7	18.41	18.98	3.16	3.25	3.29	0.96	0.9	0.88
	NC3-KCNQ1OT1	18.34	19	18.73	2.98	3.49	3.2	1.08	0.76	0.93
	NC4-KCNQ1OT1	18.08	18.65	18.63	2.89	2.8	3.1	1.46	1.56	1.26
	NC5-KCNQ1OT1	18.94	18.68	18.74	3.09	3.2	3.2	1.27	1.18	1.18
	NC6-KCNQ1OT1	19.01	18.91	19.22	3.21	2.9	3.38	1.18	1.46	1.04
	NC1-control gene	15.66	15.61	15.18
	NC2-control gene	15.55	15.16	15.69
	NC3-control gene	15.36	15.51	15.53
	NC4-control gene	15.19	15.85	15.52
	NC5-control gene	15.85	15.49	15.54
	NC6-control gene	15.8	16.01	15.84
	Oe1-KCNQ1OT1	17.67	17.62	17.46	1.91	1.89	2.02	2.1	2.13	1.95	2.156	0.169	2.523	0.198
	Oe2-KCNQ1OT1	17.74	17.03	17.31	1.78	1.65	1.86	2.3	2.51	2.18
	Oe3-KCNQ1OT1	17.25	17.29	17.41	1.89	1.88	2.01	2.14	2.14	1.96
	Oe4-KCNQ1OT1	17.8	17.26	17.1	1.96	1.6	1.63	1.75	2.24	2.21
	Oe5-KCNQ1OT1	17.44	17.33	17.27	1.73	1.69	1.67	2.05	2.11	2.14
	Oe6-KCNQ1OT1	17.42	17.71	17.09	1.57	1.8	1.73	2.29	1.95	2.05
	Oe1-control gene	15.76	15.73	15.45
	Oe2-control gene	15.96	15.38	15.45
	Oe3-control gene	15.36	15.41	15.4
	Oe4-control gene	15.55	15.22	15.62
	Oe5-control gene	15.92	15.69	15.66
	Oe6-control gene	15.51	15.46	15.88

## Sheet: Fig 5C
		NC	Oe-KCNQ1OT1
	sample1	0.724633	1.05933
	sample2	0.624044	1.14002
	sample3	0.868263	1.28374
	sample4	0.621576	1.28166
	sample5	0.728927	1.14551
	sample6	0.866437	1.05592
	mean	0.73898	1.16103
	SD	0.12274	0.11367

## Sheet: Fig 5D
		NC	Oe-KCNQ1OT1
	sample1	665.7	1031.38
	sample2	520.786	931.06
	sample3	711.104	1060.15
	sample4	540.005	1018.99
	sample5	619.973	934.76
	sample6	737.612	1068.84
	mean	632.53	1007.53
	SD	99.4	67.77

## Sheet: Fig 5F
		NC	Oe-KCNQ1OT1			NC	Oe-KCNQ1OT1
	sample1	31.4368	9.68829		sample1	7.37616	12.4211
	sample2	32.0107	10.0401		sample2	11.9212	6.99305
	sample3	32.5405	14.3156		sample3	12.3646	7.72685
	sample4	31.5749	12.857		sample4	12.5396	11.9037
	sample5	31.7921	8.3736		sample5	11.7213	6.021
	sample6	32.6209	12.8134		sample6	7.40107	9.2163
	mean	31.996	11.348		mean	10.554	9.047
	SD	0.552	2.576		SD	2.761	2.945

## Sheet: Fig 5G
	sample	Ct			Δct			2-ΔΔct			2-Δδctmean	2-ΔΔctSD	relative mean	relative SD
	NC1-KCNQ1OT1	20.25	19.5	20.32	4.4	3.86	4.82	0.37	0.53	0.27	1.199	0.092	1.029	0.079
	NC2-KCNQ1OT1	20.58	19.68	21.13	4.76	3.84	5.15	0.28	0.54	0.22
	NC3-KCNQ1OT1	20.59	21.33	19.93	5.24	5.6	4.08	0.2	0.16	0.46
	NC4-KCNQ1OT1	18.76	18.31	18.11	2.87	3.1	2.93	1.29	1.1	1.24
	NC5-KCNQ1OT1	18.45	18.72	18.86	3.01	2.94	3.07	1.17	1.22	1.12
	NC6-KCNQ1OT1	18.29	18.59	18.7	2.89	2.83	3.15	1.27	1.32	1.06
	NC1-control gene	15.9	15.21	15.17
	NC2-control gene	15.44	15.78	15.79
	NC3-control gene	15.4	15.75	15.54
	NC4-control gene	15.19	15.85	15.52
	NC5-control gene	15.85	15.49	15.54
	NC6-control gene	15.8	16.01	15.84
	Oe1-KCNQ1OT1	18.98	18.06	18.7	2.9	3.01	2.96	1.26	1.17	1.21	0.413	0.176	0.372	0.158
	Oe2-KCNQ1OT1	18.57	19.02	18.96	2.91	3.21	3.09	1.25	1.01	1.1
	Oe3-KCNQ1OT1	18.64	18.78	18.65	3.18	3	2.95	1.04	1.17	1.21
	Oe4-KCNQ1OT1	24.14	19.24	19.84	8.1	3.8	4.38	0.03	0.57	0.38
	Oe5-KCNQ1OT1	19.82	19.7	19.31	4.51	4.13	3.75	0.35	0.46	0.59
	Oe6-KCNQ1OT1	19.09	20.5	19.74	3.77	4.54	4.3	0.58	0.34	0.41
	Oe1-control gene	16.04	15.45	15.46
	Oe2-control gene	15.31	15.58	15.57
	Oe3-control gene	15.32	15.96	15.45
	Oe4-control gene	15.64	15.76	16.08
	Oe5-control gene	15.43	15.62	15.42
	Oe6-control gene	15.35	15.35	15.81
	sample	Ct			Δct			2-ΔΔct			2-Δδctmean	2-ΔΔctSD	relative mean	relative SD
	NC1-KCNQ1OT1	18.74	19.33	18.53	2.92	3.34	2.98	1	0.75	0.96
	NC2-KCNQ1OT1	19.07	18.93	18.52	3.56	3.13	2.8	0.64	0.87	1.09
	NC3-KCNQ1OT1	18.71	18.76	18.85	3.15	2.95	3.14	0.86	0.98	0.86
	NC4-KCNQ1OT1	19.2	18.68	18.69	3.27	2.83	3.53	0.88	1.2	0.73	1.007	0.155	1.029	0.158
	NC5-KCNQ1OT1	18.12	18.92	18.73	2.87	3.1	3.25	1.16	0.99	0.89
	NC6-KCNQ1OT1	18.52	18.92	18.56	2.86	3.08	3.03	1.17	1	1.04
	NC1-control gene	15.93	15.86	15.16
	NC2-control gene	15.26	15.82	15.48
	NC3-control gene	15.67	15.84	15.52
	NC4-control gene	16.03	15.27	15.56
	NC5-control gene	16.06	15.55	15.84
	NC6-control gene	15.5	15.71	15.61
	Oe1-KCNQ1OT1	17.19	17.41	17.73	2.07	2.14	2.19	2.64	2.51	2.43
	Oe2-KCNQ1OT1	17.66	17.13	17.38	2.17	2.05	2.13	2.46	2.67	2.52
	Oe3-KCNQ1OT1	18.03	17.79	17.62	2.15	2.03	2.1	2.51	2.71	2.59
	Oe4-KCNQ1OT1	18.56	18.81	18.49	3.21	3.16	2.97	1.06	1.1	1.25	1.163	0.179	1.029	0.158
	Oe5-KCNQ1OT1	18.21	18.13	18.79	3	2.84	3.01	1.23	1.37	1.22
	Oe6-KCNQ1OT1	19.65	18.79	18.21	3.67	3.12	2.87	0.77	1.13	1.34
	Oe1-control gene	15.35	15.66	15.52
	Oe2-control gene	15.21	15.29	15.79
	Oe3-control gene	15.99	15.67	15.34
	Oe4-control gene	15.77	15.36	15.33
	Oe5-control gene	15.39	15.67	15.53
	Oe6-control gene	15.58	15.55	15.74
	sample	Ct			Δct			2-ΔΔct			2-Δδctmean	2-ΔΔctSD	relative mean	relative SD
	NC1-KCNQ1OT1	18.54	19.04	18.77	3.1	3.35	3.1	0.83	0.7	0.83
	NC2-KCNQ1OT1	18.9	18.79	19.07	2.98	3.3	2.96	0.91	0.72	0.92
	NC3-KCNQ1OT1	18.62	18.6	19.1	3.05	2.9	3.25	0.86	0.95	0.75
	NC4-KCNQ1OT1	18.63	19.48	18.62	2.79	3.32	2.9	0.96	0.67	0.89	0.815	0.088	1.021	0.111
	NC5-KCNQ1OT1	18.63	18.13	18.83	3.03	2.99	3.12	0.82	0.84	0.77
	NC6-KCNQ1OT1	18.99	18.95	18.35	3.21	3.03	2.97	0.72	0.82	0.85
	NC1-control gene	15.84	16.16	15.72
	NC2-control gene	15.6	15.14	15.71
	NC3-control gene	15.78	15.92	15.38
	NC4-control gene	15.36	15.45	15.48
	NC5-control gene	15.69	15.67	15.28
	NC6-control gene	15.88	15.79	15.72
	Oe1-KCNQ1OT1	18.69	18.25	18.9	3.11	2.89	2.88	0.76	0.89	0.89
	Oe2-KCNQ1OT1	18.03	18.35	18.81	2.76	2.88	2.75	0.97	0.89	0.98
	Oe3-KCNQ1OT1	18.87	18.47	18.48	3.2	2.97	2.73	0.72	0.84	0.99
	Oe4-KCNQ1OT1	17.75	17.7	17.9	2.26	2.22	2.21	1.73	1.77	1.78	1.778	0.072	1.749	0.071
	Oe5-KCNQ1OT1	17.7	17.76	17.69	2.23	2.22	2.3	1.76	1.77	1.68
	Oe6-KCNQ1OT1	17.4	17.61	17.65	2.08	2.23	2.19	1.95	1.76	1.81
	Oe1-control gene	15.5	15.48	15.69
	Oe2-control gene	15.47	15.54	15.39
	Oe3-control gene	15.32	15.39	15.46
	Oe4-control gene	15.59	15.48	15.17
	Oe5-control gene	15.7	15.78	15.35
	Oe6-control gene	15.41	15.11	15.61
